# Supplementary material for: It is not all about the alpha: elevated expression of p53β variants is associated with lower probability of survival in a retrospective melanoma cohort
Source: Cancer Cell Int. 2023 Oct 4;23:228. doi: 10.1186/s12935-023-03083-6 (PMC10548590; doi:10.1186/s12935-023-03083-6)
Supplement: Supplementary file 2 — Additional file 2: Table S2. AmpliSeq Custom DNA Panel Details. [file 12935_2023_3083_MOESM2_ESM.xlsx]

## Sheet: Supplementary Table S2
Supplementary Table S2: AmpliSeq Custom DNA Panel Details
# AmpliSeq_Version=7.49
# Genome=hg19
# Workflow=DNA
# Total_Targets=12
# Total_Amplicons=32
Request_ID	Target_ID	Gene_Symbol	Chromosome	Chr_Start	Chr_End	Num_Amplicons	Total_Bases	Covered_Bases	Missed_Bases	Coverage
IAA28223	17883	TP53	chr17	7572902	7573033	3	132	132	0	1
IAA28223	17876	TP53	chr17	7573902	7574058	2	157	157	0	1
IAA28223	17881	TP53	chr17	7576512	7576609	2	98	98	0	1
IAA28223	17888	TP53	chr17	7576600	7576682	2	83	83	0	1
IAA28223	17879	TP53	chr17	7576828	7576951	3	124	124	0	1
IAA28223	17875	TP53	chr17	7576994	7577180	4	187	187	0	1
IAA28223	17877	TP53	chr17	7577474	7577633	3	160	160	0	1
IAA28223	17878	TP53	chr17	7578152	7578314	3	163	163	0	1
IAA28223	17884	TP53	chr17	7578346	7578579	4	234	234	0	1
IAA28223	17874	TP53	chr17	7579287	7579615	6	329	321	8	0.976
IAA28223	17887	TP53	chr17	7579675	7579746	2	72	59	13	0.819
IAA28223	17880	TP53	chr17	7579814	7579937	2	124	124	0	1
